# Supplementary material for: Crystal structure, infrared spectroscopy and thermodynamic properties of a manganese member of the ellenbergerite family
Source: Royal Society of Chemistry journal article supplement (doi:10.1039/d3nj05142k), 2023-12-22
Supplement: d3nj05142k1.pdf [file d3nj05142k1.pdf]

## SUPPORTING INFORMATION

### Crystal structure, infrared spectroscopy and thermodynamic properties of a manganese member of ellenbergerite family

Larisa V. Shvanskaya,<sup>a</sup> Polina V. Krikunova,<sup>b</sup> Tatyana M. Vasilchikova,<sup>a</sup> Elena Y. Borovikova,<sup>c</sup> Olga S. Volkova,<sup>a</sup> Alexander N. Vasiliev<sup>a</sup>

<sup>a</sup>Lomonosov Moscow State University, Moscow 119991, Russia.

<sup>b</sup>FSRC "Crystallography and Photonics" RAS, Moscow 119333, Russia.

<sup>c</sup>Kola Science Centre, RAS, Apatity 184209, Russia.

\* E-mail: lshvanskaya@mail.ru

**Table S1.** Crystal data and details of the X-ray data collection and refinement for  $\text{Mn}_{6.75}(\text{OH})_3\text{H}_{1.20}(\text{VO}_4)_{4-2z}(\text{V}_2\text{O}_7)_z$  ( $z = 0.15$ )

|                                                                            |                                                                                                                             |
|----------------------------------------------------------------------------|-----------------------------------------------------------------------------------------------------------------------------|
| $M_r$                                                                      | 880.335                                                                                                                     |
| Crystal system, space group                                                | Hexagonal, $P6_3mc$                                                                                                         |
| Temperature (K)                                                            | 293                                                                                                                         |
| $a, c$ (Å)                                                                 | 13.1893 (5), 5.2408 (2)                                                                                                     |
| $V$ (Å <sup>3</sup> ), $Z$                                                 | 789.54 (7), 2                                                                                                               |
| Radiation type                                                             | Mo $K\alpha$                                                                                                                |
| $\mu$ (mm <sup>-1</sup> )                                                  | 7.55                                                                                                                        |
| Crystal size (mm)                                                          | 0.251x0.043x0.036                                                                                                           |
| Diffractometer                                                             | Bruker D8 Quest diffractometer with Photon III detector                                                                     |
| Absorption correction                                                      | Multi-scan<br>SADABS 2016/2: Krause, L., Herbst-Irmer, R., Sheldrick G.M. & Stalke D., J. Appl. Cryst. 48 (2015) 3-10       |
| $T_{\min}, T_{\max}$                                                       | 0.510, 0.650                                                                                                                |
| No. of measured, independent and observed [ $I > 2\sigma(I)$ ] reflections | 7817, 858, 816                                                                                                              |
| $R_{\text{int}}$                                                           | 0.046                                                                                                                       |
| $(\sin \theta/\lambda)_{\text{max}}$ (Å <sup>-1</sup> )                    | 0.703                                                                                                                       |
| $R[F^2 > 2\sigma(F^2)], wR(F^2), S$                                        | 0.018, 0.040, 1.08                                                                                                          |
| No. of reflections/parameters/restraints                                   | 858/68/4                                                                                                                    |
| $\rho_{\text{max}}, \rho_{\text{min}}$ (e Å <sup>-3</sup> )                | 0.72, -0.53                                                                                                                 |
| Absolute structure                                                         | Flack x determined using 355 quotients [(I+)-(I-)]/[(I+)+(I-)] (Parsons, Flack and Wagner, Acta Cryst. B69 (2013) 249-259). |
| Absolute structure parameter                                               | 0.04 (2)                                                                                                                    |

Computer programs: *SHELXL2018/3* (Sheldrick, 2018).

**Table S2.** Bond valence data for  $\text{Mn}_{6.75}(\text{OH})_3\text{H}_{1.20}(\text{VO}_4)_{4-2z}(\text{V}_2\text{O}_7)_z$  ( $z = 0.15$ )\*

| Atom     | Mn1                                        | Mn2(0.749**)                               | V1                  | V2A(0.847)          | V2B(0.153**)        | H1   | H2    | H3    | $\Sigma$ |
|----------|--------------------------------------------|--------------------------------------------|---------------------|---------------------|---------------------|------|-------|-------|----------|
| O1       |                                            | 0.264 <sub>3↓</sub><br>0.260 <sub>3↓</sub> | 1.255               |                     |                     |      |       |       | 1.779    |
| O2       | 0.429 <sub>2→</sub>                        |                                            | 1.199               |                     |                     |      |       |       | 2.057    |
| O3       | 0.414<br>0.412                             |                                            | 1.293 <sub>2↓</sub> |                     |                     |      |       |       | 2.119    |
| O4       | 0.302 <sub>2→</sub><br>0.235 <sub>2→</sub> |                                            |                     |                     |                     | 0.96 | 0.01  |       | 2.044    |
| O5       | 0.400 <sub>2→</sub>                        |                                            |                     | 1.095 <sub>3↓</sub> | 0.142 <sub>3↓</sub> | 0.02 | 0.01  | 0.168 | 2.035    |
| O6       |                                            |                                            |                     | 0.944               | 0.089               | 0.02 | 0.696 | 0.01  | 1.759    |
| $\Sigma$ | 2.192                                      | 1.572                                      | 5.040               | 4.229               | 0.515               |      |       |       |          |

\*The symbols ↓ and →, show a multiplication of the corresponding contribution in the columns and rows due to symmetry

\*\*occupation of atomic position

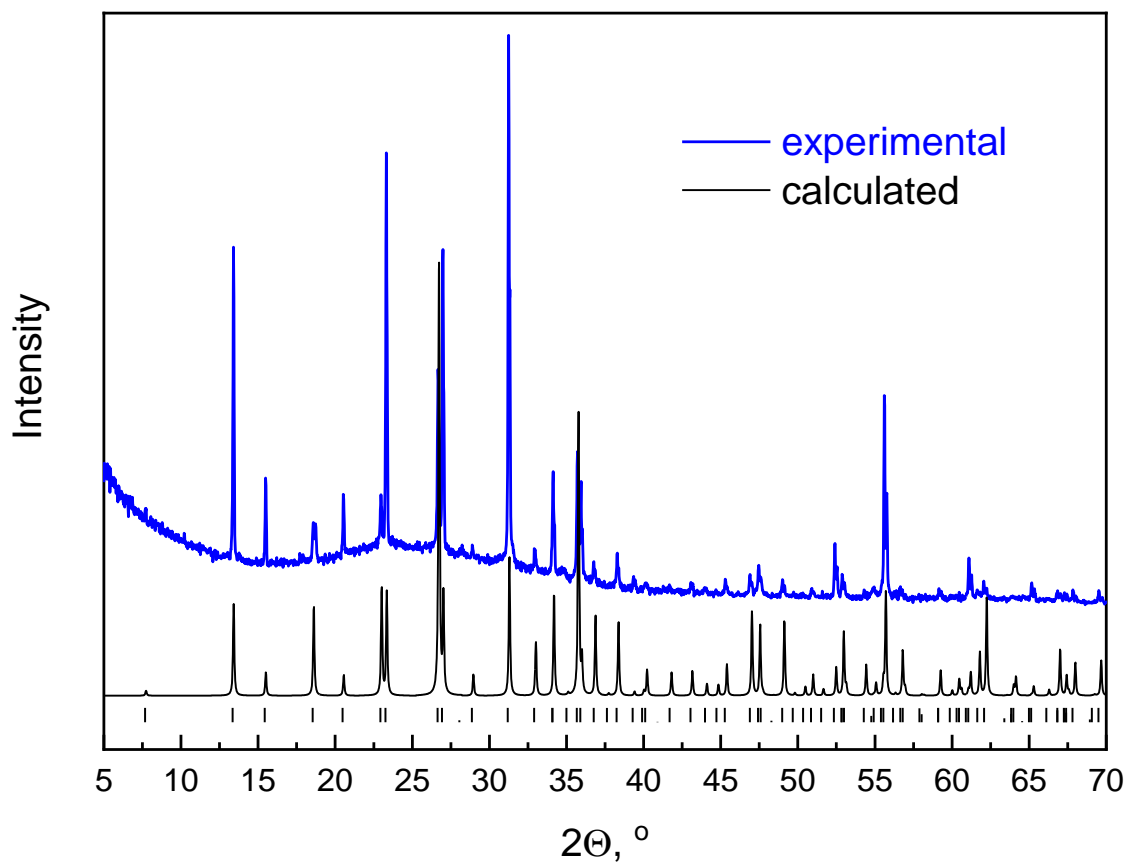

**Figure S1.** Experimental and calculated powder XRD patterns of  $\text{Mn}_{6.75}(\text{OH})_3\text{H}_{1.20}(\text{VO}_4)_{4-2z}(\text{V}_2\text{O}_7)_z$  ( $z = 0.15$ ) (the vertical ticks indicate the Bragg positions).
